# Supplementary material for: Prospective Comparison of 18F-Choline Positron Emission Tomography/Computed Tomography (PET/CT) and 18F-Fluorodeoxyglucose (FDG) PET/CT in the Initial Workup of Multiple Myeloma: Study Protocol of a Prospective Imaging Trial
Source: PubMed Central journal article supplement (PMC7516691; doi:10.2196/17850), 2020-09-10
Supplement: resprot_v9i9e17850_app2.pdf [file resprot_v9i9e17850_app2.pdf]

# APPEL D'OFFRES INTERNE 2017

## Fiche d'évaluation du projet complet

**PORTEUR DU PROJET** : Charles Mesguich

**TITRE DU PROJET** : COMPARAISON PROSPECTIVE, LORS DU BILAN D'EXTENSION INITIAL DE MYELOME MULTIPLE, DE LA TEP-TDM A LA 18F-FLUOROCHOLINE ET DE LA TEP-TDM AU 18F-FDG

|                                                                                                               |                                                                      |
|---------------------------------------------------------------------------------------------------------------|----------------------------------------------------------------------|
| <b>1. Originalité</b>                                                                                         |                                                                      |
| <input type="checkbox"/> Aucune <input type="checkbox"/> Partielle <input checked="" type="checkbox"/> Totale |                                                                      |
| Commentaire argumenté (détailler les points forts et les points faibles)                                      |                                                                      |
| <b>2. Hypothèse, Méthodologie</b>                                                                             |                                                                      |
| Hypothèse scientifique clairement mentionnée                                                                  | <input checked="" type="checkbox"/> Oui <input type="checkbox"/> Non |
| Objectif principal clair, en cohérence avec l'hypothèse principale                                            | <input checked="" type="checkbox"/> Oui <input type="checkbox"/> Non |
| Critère d'évaluation principal : fiable, pertinent                                                            | <input checked="" type="checkbox"/> Oui <input type="checkbox"/> Non |
| Schéma et méthodes pertinents pour l'hypothèse et l'objectif principal                                        | <input checked="" type="checkbox"/> Oui <input type="checkbox"/> Non |
| Critères d'inclusion et non inclusion : clairs, adaptés                                                       | <input checked="" type="checkbox"/> Oui <input type="checkbox"/> Non |
| Calcul du nombre de sujets nécessaire : clair, adapté                                                         | <input checked="" type="checkbox"/> Oui <input type="checkbox"/> Non |
| Commentaire argumenté (détailler les points forts et les points faibles)                                      |                                                                      |
| <b>Sujet original et pertinent d'un point de vue clinique, très bonne méthodologie, réaliste pour un AOI</b>  |                                                                      |
| <b>3. Faisabilité</b>                                                                                         |                                                                      |
| Potentiel de recrutement dans le temps imparti par l'AOI (2 ans)                                              | <input checked="" type="checkbox"/> Oui <input type="checkbox"/> Non |
| Maîtrise des circuits (produits, patients, prélèvements...)                                                   | <input checked="" type="checkbox"/> Oui <input type="checkbox"/> Non |
| Commentaire argumenté (détailler les points forts et les points faibles)                                      |                                                                      |
| Recrutement tout à fait réaliste                                                                              |                                                                      |
| <b>4. Qualité rédactionnelle</b>                                                                              |                                                                      |
| <input type="checkbox"/> Faible <input type="checkbox"/> Bonne <input checked="" type="checkbox"/> Très bonne |                                                                      |
| Commentaire argumenté (détailler les points forts et les points faibles)                                      |                                                                      |
| Très bonne qualité rédactionnelle                                                                             |                                                                      |
| <b>5. Retombées attendues</b>                                                                                 |                                                                      |
| En termes de connaissances scientifiques                                                                      | <input checked="" type="checkbox"/> Oui <input type="checkbox"/> Non |
| Conséquences en santé publique et/ou pour les patients                                                        | <input checked="" type="checkbox"/> Oui <input type="checkbox"/> Non |
| Commentaire argumenté (détailler les points forts et les points faibles)                                      |                                                                      |
| <b>6. Aspects budgétaires</b>                                                                                 |                                                                      |
| Adéquation des crédits demandés*                                                                              | <input checked="" type="checkbox"/> Oui <input type="checkbox"/> Non |
| Commentaire argumenté (détailler les points forts et les points faibles)                                      |                                                                      |
| Budget calculé de façon réaliste avec soutien industriel                                                      |                                                                      |
| Conclusion                                                                                                    |                                                                      |
| Excellent projet, clairement présenté, réaliste avec retombées cliniques dans la prise en charge du myelome   |                                                                      |

Projet de phase pilote permettant d'envisager la soumission à un appel à projets national à venir     Oui     Non

## Liens d'intérêt et confidentialité

Je m'engage à respecter la plus stricte confidentialité concernant ce projet

Je déclare avoir examiné ce projet en l'absence de lien d'intérêt avec le projet, le porteur de son projet et son équipe.

Je déclare les liens d'intérêts potentiels suivants :

| Type de lien | Dates | Commentaire |
|--------------|-------|-------------|
|              |       |             |
|              |       |             |
|              |       |             |
|              |       |             |

\* Les coûts de Promotion ne sont pas éligibles à l'Appel d'offres Interne (soutien technico-réglementaire, monitoring, vigilance, méthodologie).
